# Supplementary material for: Cereal Crop Proteomics: Systemic Analysis of Crop Drought Stress Responses Towards Marker-Assisted Selection Breeding
Source: Front Plant Sci. 2017 Jun 2;8:757. doi: 10.3389/fpls.2017.00757 (PMC5454074; doi:10.3389/fpls.2017.00757)
Supplement: Supporting Table 1 — Comparison between drought stress EST markers (Choudhary et al., 2015) and drought stress proteomic markers (Ghatak et al., 2016). [file Table1.xlsx]

## Sheet: Hajheidari et al., 2007-seeds
Hajheidari et al., 2007- Seeds					Ghatak et al., 2016 -Seeds
Accession	AGI Orthologues	Description			PM (Pearl Millet) Accession	AGI Codes		Common protein Candidates
P52572	AT1G48130	B15C protein			Pgl_GLEAN_10022988	AT5G42790		AT1G07750	RmlC-like cupins superfamily protein
JQ0351		HSP 17			Pgl_GLEAN_10030219	AT3G06580
P17314		Alpha-amylase inhibitor, tetramric, chain CM3 precursor			Pgl_GLEAN_10015508	AT5G16150
P01085		Alpha-amylase inhibitor 0.19			Pgl_GLEAN_10000489	AT1G07750
Q8LHX6	AT1G09310	P0022B05.25 protein			Pgl_GLEAN_10028490
Q8LHX6	AT1G09310	P0022B05.25 protein			Pgl_GLEAN_10004666	AT2G21660
Q8H0B8	AT5G01300	Cold regulated protein			Pgl_GLEAN_10026551	AT1G48030
P16159		Alpha-amylase inhibitor, tetramric, chain CM3 precursor			Pgl_GLEAN_10030769
P16159		Alpha-amylase inhibitor, tetramric, chain CM3 precursor			Pgl_GLEAN_10001639
Q4U1A2		Alpha-amylase inhibitor 0.19, chain A			Pgl_GLEAN_10007218	AT4G03200
O64394	AT1G45145	Thioredoxin H-type
O64394	AT1G45145	Thioredoxin H-type
O64394	AT1G45145	Thioredoxin H-type
Q8H0K8	AT1G03230	Xylanase inhibitor precursor
Q9SPA1		Elongation factor-1 alpha 3
Q84UH6	AT1G75270	Dehydroascorbate reductase
P26517	AT3G04120	Glyceraldehyde-3-phosphate dehydrogenase
Q8LQS5	AT2G32520	Putative carboxymethylene butenolidase
Q8H8U5	AT3G55040	Putative glutathione S-transferase
CAB61629		mRNA for Spermidine synthase1
S42535		Alanine transaminase
Q43012		Starch granule-band starch synthase
Q7X9M2	AT2G32290	Beta amylase (fragment)
T02221		Phosphopyruvate hydratase
O04818	AT1G11840	Hypothetical protein
Q84TL6	AT1G07750	Legumin-like protein
Q93XQ8	AT1G21750	Protein disulfide isomerase2 precursor
Q93XQ8	AT1G21750	Protein disulfide isomerase2 precursor
Q93XQ7	AT1G21750	Protein disulfide isomerase3 precursor
P12810	AT1G53540	HSP 17
O49956		Alpha-amylase inhibitor
P01083		Alpha-amylase inhibitor 0.28
Q8GTB0	AT5G09590	Putative HSP 70, mitochondrial precursor
Q8GTB0	AT5G09590	Putative HSP 70, mitochondrial precursor
Q9SAU8	AT3G12580	HSP 70
Q9SAU8	AT3G12580	HSP 70
Q9AVA6	AT4G14030	Putative selenium binding protein
Q8RZF3		Putative ketol acid reductoisomerase
P12810	AT1G53540	HSP 17
P17314		Alpha-amylase inhibitor, tetramric, chain CM3 precursor
Q84MJ5	AT2G14170	Methylmalonate semialdehyde dehydrogenase (fragment)
Q8H0B8	AT5G01300	Cold regulated protein
CAD19324		Partial mRNA for WSCI proteinase inhibitor
S16525		HSP 17.3
T06597		Serpin homolog WZS3
BAB92017		Mitochondrial aldehyde dehydrogenase
T06597		Serpin homolog WZS3
Q41593	AT1G47710	Serpin
Q6SNP7	AT4G15210	Beta amylase 1 mRNA
P46518		LEA protein
Q9ZQW6		LEA protein
Q7XYC3		19 KD globulin (fragment)
P12810	AT1G53540	HSP 17
Q9AXH7	AT1G48130	1-Cys peroxiredoxin
P01085		Alpha-amylase inhibitor 0.19
Q84MJ5	AT2G14170	Methylmalonate semialdehyde dehydrogenase (fragment)
Q9ZNS9	AT1G05510	Embryo specific protein

## Sheet: Liu Hui et al.2015-Leaves
Liu Hui et al.2015					Ghatak et al., 2016 - Leaves			Common
Leaves								AT1G12900	glyceraldehyde 3-phosphate dehydrogenase A subunit 2 (GAPA-2)
	Accession	AGI Codes			PM (Pearl millet)(Leaves DE	AGI Codes		AT3G50820	OEC33, OXYGEN EVOLVING COMPLEX SUBUNIT 33 KDA, PHOTOSYSTEM II SUBUNIT O-2, PSBO-2, PSBO2
	gi|144583566	ATCG00490			Pgl_GLEAN_10014726	AT5G62740
	gi|144583566	ATCG00490			Pgl_GLEAN_10030783
	gi|1488575	ATCG00490			Pgl_GLEAN_10013725	AT2G34420
	gi|144583566	ATCG00490			Pgl_GLEAN_10013085	AT3G27690
	gi|125580	AT1G32060			Pgl_GLEAN_10037327	AT2G34420
	gi|326527757	AT4G38970	AT2G21330		Pgl_GLEAN_10019779	AT1G26220
	gi|326502358	AT3G04790			Pgl_GLEAN_10028876	AT2G37170
	gi|326502358	AT3G04790			Pgl_GLEAN_10028121
	gi|326530368	AT3G04790			Pgl_GLEAN_10037787	AT5G52100
	gi|357123664	AT4G02530			Pgl_GLEAN_10005143	AT4G39710
	gi|357147204	AT2G46820			Pgl_GLEAN_10028064
	gi|326500100	AT1G12900	AT3G26650		Pgl_GLEAN_10008353
	gi|20302471	AT1G20020			Pgl_GLEAN_10019292	AT5G16450
	gi|290875537	AT5G14740			Pgl_GLEAN_10004798
	gi|326487308	AT3G50820			Pgl_GLEAN_10010145
	gi|14030667	AT1G03475			Pgl_GLEAN_10015411	AT2G14170
	gi|326513514	AT4G09010			Pgl_GLEAN_10005779	AT3G46100
	gi|326500472	AT5G19510			Pgl_GLEAN_10015409	AT5G03795
	gi|23504745	AT3G62760			Pgl_GLEAN_10002792	AT5G04710
	gi|326496957	AT5G06290			Pgl_GLEAN_10030018	AT5G59890
	gi|326496957	AT5G06290			Pgl_GLEAN_10026635
	gi|38344034	AT5G06290			Pgl_GLEAN_10013187	AT2G30620
	gi|1568639	AT2G28190			Pgl_GLEAN_10027569	AT2G34420
	gi|326487296	AT1G15980			Pgl_GLEAN_10001175
	gi|357156300	AT5G28840			Pgl_GLEAN_10017437	AT3G10920
	gi|22022400	AT3G62760			Pgl_GLEAN_10033321	AT1G17290
	gi|75147302	AT5G54160			Pgl_GLEAN_10030168	AT1G56500
	gi|357144699	AT1G11840			Pgl_GLEAN_10028793
	gi|16517113	AT1G45145			Pgl_GLEAN_10030289	AT1G57770
	gi|326496957	AT5G06290			Pgl_GLEAN_10004901	AT5G06460
	gi|326505132				Pgl_GLEAN_10008425	AT1G53850
	gi|111073715	AT1G47128			Pgl_GLEAN_10025482
	gi|326495678	AT2G05840	AT5G35590		Pgl_GLEAN_10007878	AT3G58140
	gi|326510107	AT4G38630			Pgl_GLEAN_10015784	AT5G01530
	gi|222101569	AT3G12490			Pgl_GLEAN_10000674	AT5G08680
	gi|357126490	AT4G14030	AT4G14040		Pgl_GLEAN_10006086	AT5G15490
	gi|357147646	AT3G01480			Pgl_GLEAN_10014986	AT4G31180
	gi|133741925	AT5G13120			Pgl_GLEAN_10033667	AT4G36130
	gi|313103619	AT5G40040	AT2G27710		Pgl_GLEAN_10020225
	gi|357148670	AT4G35450			Pgl_GLEAN_10012602
	gi|13486733	AT3G62030			Pgl_GLEAN_10033485
	gi|56554972	AT5G02500	AT3G12580	AT3G09440	Pgl_GLEAN_10016313
	gi|357114085	AT3G23990	AT2G33210	AT3G13860	Pgl_GLEAN_10030401	AT1G76080
	gi|357112501	AT5G30510			Pgl_GLEAN_10026969	AT4G09040
	gi|326506396	AT2G33800			Pgl_GLEAN_10014734	AT3G24420
	gi|326491885	AT1G18080			Pgl_GLEAN_10021406	AT2G35500
	gi|7711024	AT2G18110			Pgl_GLEAN_10003206
	gi|326495080	AT3G27850			Pgl_GLEAN_10021430	AT2G35490
	gi|326507838	AT5G13510			Pgl_GLEAN_10008923
	gi|195639862	AT3G49470			Pgl_GLEAN_10016566	AT1G23740
	gi|251832993	AT5G35630			Pgl_GLEAN_10000606	AT3G16640
	gi|251832993	AT5G35630			Pgl_GLEAN_10019203
	gi|213958273	AT3G59760			Pgl_GLEAN_10009112	AT3G50820
	gi|585032	AT4G14880			Pgl_GLEAN_10013567	AT3G61470
	gi|300681536	AT5G17330	AT2G02010	AT3G17760	Pgl_GLEAN_10006857	AT5G42960
	gi|122220777	AT3G17390	AT1G02500	AT4G01850	Pgl_GLEAN_10028069
	gi|295917894	AT3G61440	AT3G59760		Pgl_GLEAN_10014847	AT1G65970
	gi|326497643	AT1G75330			Pgl_GLEAN_10001520
	gi|729003	AT5G14740			Pgl_GLEAN_10021964	AT1G15820
	gi|326503994	AT5G66760	AT2G18450		Pgl_GLEAN_10000489	AT1G07750
	gi|357139257	AT2G44350	AT3G60100		Pgl_GLEAN_10034841	AT5G62740
	gi|326513418	AT4G10260	AT3G59480		Pgl_GLEAN_10002667	AT5G38660
	gi|326516286	AT5G28840			Pgl_GLEAN_10010310
	gi|326512374	AT2G29570			Pgl_GLEAN_10022888
	gi|326496905	AT2G35410			Pgl_GLEAN_10034711	AT3G47470
	gi|195616892	AT5G20630			Pgl_GLEAN_10013653	AT1G68830
	gi|4158232	AT5G15650	AT3G02230	AT3G08900	Pgl_GLEAN_10017620	AT5G06720
	gi|357128825	AT4G20260			Pgl_GLEAN_10036281	AT3G14940
	gi|357124929	AT5G46290			Pgl_GLEAN_10023186
	gi|144583566	ATCG00490			Pgl_GLEAN_10000605	AT5G44650
	gi|1488577	ATCG00490			Pgl_GLEAN_10006840	AT3G60810
	gi|115392208	AT2G39730			Pgl_GLEAN_10023966	AT5G11720
	gi|326493652	AT4G26530			Pgl_GLEAN_10028447
	gi|290875537	AT5G14740			Pgl_GLEAN_10026937	AT4G01050
	gi|326500100	AT1G12900			Pgl_GLEAN_10028323	AT3G04870
	gi|144583566	ATCG00490			Pgl_GLEAN_10021055
	gi|326494300	AT2G39730			Pgl_GLEAN_10026105
	gi|2565305	AT4G33010	AT2G26080	AT4G33010	Pgl_GLEAN_10003133	AT5G05340
	gi|115589742	AT2G44160	AT3G59970		Pgl_GLEAN_10023233	AT2G04039
	gi|122220777	AT3G17390	AT1G02500	AT4G01850	Pgl_GLEAN_10005205	AT5G20720
	gi|223635282	AT4G01850	AT3G17390	AT1G02500	Pgl_GLEAN_10014066	AT1G07700
	gi|326533372	AT3G60750	AT2G45290		Pgl_GLEAN_10018665
	gi|326533372	AT3G60750	AT2G45290		Pgl_GLEAN_10024612
	gi|60100214	AT3G17020			Pgl_GLEAN_10035773
	gi|255076635	AT3G19170	AT1G49630		Pgl_GLEAN_10017685
	gi|326517467	AT2G39050			Pgl_GLEAN_10016932	AT5G09810
	gi|357149925	AT4G20360			Pgl_GLEAN_10008934
	gi|116317857	ATMG00860			Pgl_GLEAN_10010788	AT1G61520
	gi|556673	AT2G04030	AT3G07770		Pgl_GLEAN_10032990	AT5G50920
	gi|326495158	AT5G28540	AT5G42020	AT1G09080	Pgl_GLEAN_10001595	AT1G36280
	gi|326517593	AT5G63400			Pgl_GLEAN_10025556	AT1G06680
	gi|326523455	AT3G58610			Pgl_GLEAN_10001789	AT2G21870
	gi|357128497	AT1G79870			Pgl_GLEAN_10029347	AT3G54050
	gi|283777738	AT3G05530	AT1G09100		Pgl_GLEAN_10004517
	gi|307110690	AT1G63770			Pgl_GLEAN_10014871	AT1G14540
	gi|125580806	AT4G02990			Pgl_GLEAN_10002809	AT5G09810
	gi|238014852	AT2G29690			Pgl_GLEAN_10007875	AT3G06350
	gi|326523645	AT2G44920			Pgl_GLEAN_10034557	AT5G01410
					Pgl_GLEAN_10010568	AT1G12900
					Pgl_GLEAN_10023896	AT1G17160
					Pgl_GLEAN_10019743	AT1G03860
					Pgl_GLEAN_10000891
					Pgl_GLEAN_10006042	AT1G77380
					Pgl_GLEAN_10029289	AT3G15360
					Pgl_GLEAN_10018660
					Pgl_GLEAN_10012084	AT2G24820
					Pgl_GLEAN_10033184	AT3G10740
					Pgl_GLEAN_10006836	AT2G28000
					Pgl_GLEAN_10025601	AT5G35170
					Pgl_GLEAN_10006755	AT1G77490
					Pgl_GLEAN_10034809	AT5G27560
					Pgl_GLEAN_10015796	AT5G54270
					Pgl_GLEAN_10037666	AT3G01440
					Pgl_GLEAN_10011348
					Pgl_GLEAN_10031436
					Pgl_GLEAN_10016086	AT5G03630
					Pgl_GLEAN_10038288
					Pgl_GLEAN_10018367
					Pgl_GLEAN_10032833	AT2G20260
					Pgl_GLEAN_10033833	AT3G14420

## Sheet: Liu Hui et al.2015-Roots
Liu Hui et al.2015			Ghatak et al., 2016 - Roots
Roots
Accession	AGI Codes		PM (Pearl millet) Accession	AGI Codes
gi|326509649	AT3G29360		Pgl_GLEAN_10006975	AT5G15490
gi|326533372	AT3G60750		Pgl_GLEAN_10013122
gi|326513012	AT5G13420		Pgl_GLEAN_10030607
gi|226316439	AT2G36460		Pgl_GLEAN_10030129	AT3G16910
gi|357113872	AT5G61410		Pgl_GLEAN_10038571	AT1G60690
gi|357164069			Pgl_GLEAN_10031278	AT3G19450
gi|226316439			Pgl_GLEAN_10031829	AT4G35450
gi|68655495	AT5G17920		Pgl_GLEAN_10002933
gi|75104955	AT2G22250		Pgl_GLEAN_10022182	AT2G15480
gi|300681536	AT5G17330		Pgl_GLEAN_10032396	AT1G55020
gi|68655495	AT5G17920		Pgl_GLEAN_10007781	AT5G09650
gi|326521510	AT1G71695		Pgl_GLEAN_10037166	AT2G36530
gi|357131697			Pgl_GLEAN_10027847	AT1G54320
gi|326490674	AT1G10360		Pgl_GLEAN_10020577	AT3G04880
gi|162414848	AT2G26040		Pgl_GLEAN_10022809	AT4G10540
gi|326493572	AT2G17420		Pgl_GLEAN_10002649	AT2G05790
gi|326508997	AT4G11650		Pgl_GLEAN_10010682	AT2G04030
gi|15808777	AT1G07890		Pgl_GLEAN_10010310
gi|326529393	AT2G47730		Pgl_GLEAN_10010809
gi|204309003	AT1G05260		Pgl_GLEAN_10016081	AT5G40810
gi|326494024	AT3G12110		Pgl_GLEAN_10033988	AT3G13580
gi|326502384	AT4G02580		Pgl_GLEAN_10038412	AT5G65720
gi|357122954	AT3G52300		Pgl_GLEAN_10007586	AT2G38810
gi|357150251	AT5G03300		Pgl_GLEAN_10021024	AT3G08510
gi|357161047	AT3G10300
gi|326506676	AT4G17870
gi|357163980	AT3G02520
gi|357154924
gi|357125970	AT3G27430
gi|77744851	AT5G58070
gi|326492075	AT1G29250
gi|357111421	AT3G63270
gi|28413147	AT1G16350
gi|3219763	AT5G09810
gi|1174745	AT2G21170
gi|110288669
gi|326525745	AT4G01070
gi|326499686	AT2G43180
gi|326522650	AT1G79550
gi|18076790	AT1G70730
gi|326505978	AT4G34200
gi|158513193	AT5G01320
gi|115467370
gi|326507324	AT5G14780
gi|326505978
gi|158513193
gi|144583566	ATCG00490
gi|357117328
gi|32400802	AT3G08590
gi|68655456	AT4G13940
gi|251832986	AT5G35630
gi|13375567	AT2G45300
gi|115589742	AT2G44160
gi|326513056	AT1G77670
gi|326526355	AT2G37040
gi|326517006	AT1G76140
gi|326493416	AT1G11840
gi|34334012	AT4G11600
gi|3023751	AT3G25230
gi|2655420	AT5G02500
gi|326495158	AT5G28540
gi|326495158	AT5G28540
gi|326501026	AT3G03960
gi|20559	AT5G02500	AT3G09440
gi|110915684	ATCG00480	AT5G08690
gi|108773085	ATCG00480	AT5G08690
gi|525291	AT5G08680	AT5G08690
gi|326529099	AT2G44100	AT5G09550
gi|326513540	AT3G02090
gi|307109661	AT1G53750
gi|357135121	AT2G32520
gi|209944121	AT3G15730
gi|326498091	AT5G56680
gi|162459484
gi|357162977	AT1G10840
gi|326519084	AT1G50200
gi|326517593	AT5G63400
gi|145349320	AT2G17900
gi|242049774	AT3G01850
gi|302762607	AT5G54160
gi|242066452	AT4G11600
gi|125547139	AT2G27170
gi|242091237	AT3G13860	AT2G33210
gi|255081574
gi|51969886	AT4G17050

## Sheet: Wheat vs PM
	WHEAT AGI-Drought (Liu et al., 2015, Hajheidari et al., 2007)	PM (Pearl millet) AGI-ALL (Control and Drought ) Ghatak et al., 2016	PM (Pearl millet) AGI-Drought (Ghatak et al., 2016)
Leaves	ATCG00490	AT5G38660	AT5G15490
Leaves	ATCG00490	AT1G15820	AT3G16910
Leaves	ATCG00490	AT2G34420	AT1G60690
Leaves	ATCG00490	AT2G34420	AT3G19450
Leaves	AT1G32060	AT3G27690	AT4G35450
Leaves	AT4G38970	AT4G10340	AT2G15480
Leaves	AT3G04790	AT5G01530	AT1G55020
Leaves	AT3G04790	AT1G06680	AT5G09650
Leaves	AT3G04790	AT1G44575	AT2G36530
Leaves	AT4G02530	AT1G77090	AT1G54320
Leaves	AT2G46820	AT1G79040	AT3G04880		8 common elements in "Wheat AGI Stress" and "PM (Pearl Millet) AGI Stress":
Leaves	AT1G12900	AT2G39470	AT4G10540		AGI Accession	Discription	Identification
Leaves	AT1G20020	AT3G50820	AT2G05790		AT1G12900	glyceraldehyde 3-phosphate dehydrogenase A subunit 2 (GAPA-2)	Leaves Wheat and PM
Leaves	AT5G14740	AT4G05180	AT2G04030		AT3G50820	Unknown protein	Leaves Wheat and PM
Leaves	AT3G50820	AT4G15510	AT5G40810		AT4G35450	Involved in targeting of chloroplast outer membrane proteins to the chloroplast.	Leaves Wheat	PM Root
Leaves	AT1G03475	AT5G23120	AT3G13580		AT2G04030	Encodes a chloroplast-targeted 90-kDa heat shock protein	Leaves Wheat	PM Root
Leaves	AT4G09010	AT1G61520	AT5G65720		AT5G09810	Member of Actin gene family.Mutants are defective in germination and root growth.	Leaves PM	Wheat Root
Leaves	AT5G19510	AT1G03130	AT2G38810		AT5G08680	Encodes the mitochondrial ATP synthase beta-subunit.	Leaves PM	Wheat Root
Leaves	AT3G62760	AT2G20260	AT3G08510		AT1G07750	RmlC-like cupins superfamily protein	Seed Wheat and PM	PM Leaf
Leaves	AT5G06290	AT4G12800	AT5G42790		AT2G14170	Arabidopsis thaliana methylmalonate-semialdehyde dehydrogenase	Seed Wheat	PM Leaf
Leaves	AT5G06290	AT4G03280	AT3G06580
Leaves	AT5G06290	AT1G68830	AT5G16150
Leaves	AT2G28190	AT4G09650	AT1G07750
Leaves	AT1G15980	AT4G32260	AT2G21660
Leaves	AT5G28840	AT1G64770	AT1G48030
Leaves	AT3G62760	AT4G22260	AT4G03200
Leaves	AT5G54160	AT4G22890	AT5G62740
Leaves	AT1G11840	AT1G76100	AT2G34420
Leaves	AT1G45145	AT1G20020	AT3G27690
Leaves	AT5G06290	AT1G20020	AT2G34420
Leaves	AT1G47128	AT4G37925	AT1G26220
Leaves	AT2G05840	AT3G14420	AT2G37170
Leaves	AT4G38630	AT3G14420	AT5G52100
Leaves	AT3G12490	AT1G70580	AT4G39710
Leaves	AT4G14030	AT2G13360	AT5G16450
Leaves	AT3G01480	AT2G26080	AT2G14170
Leaves	AT5G13120	AT1G11860	AT3G46100
Leaves	AT5G40040	AT1G68010	AT5G03795
Leaves	AT4G35450	AT1G79870	AT5G04710
Leaves	AT3G62030	AT1G80380	AT5G59890
Leaves	AT5G02500	AT3G04790	AT2G30620
Leaves	AT3G23990	AT5G61410	AT2G34420
Leaves	AT5G30510	AT1G32060	AT3G10920
Leaves	AT2G33800	AT1G32060	AT1G17290
Leaves	AT1G18080	AT1G55490	AT1G56500
Leaves	AT2G18110	AT2G28000	AT1G57770
Leaves	AT3G27850	AT2G28000	AT5G06460
Leaves	AT5G13510	AT2G39730	AT1G53850
Leaves	AT3G49470	AT1G56190	AT3G58140
Leaves	AT5G35630	AT1G12900	AT5G01530
Leaves	AT5G35630	AT1G42970	AT5G08680
Leaves	AT3G59760	AT2G21170	AT5G15490
Leaves	AT4G14880	AT2G01140	AT4G31180
Leaves	AT5G17330	AT4G26530	AT4G36130
Leaves	AT3G17390	AT4G38970	AT1G76080
Leaves	AT3G61440	AT4G38970	AT4G09040
Leaves	AT1G75330	AT3G54050	AT3G24420
Leaves	AT5G14740	AT2G45290	AT2G35500
Leaves	AT5G66760	AT2G45290	AT2G35490
Leaves	AT2G44350	AT3G55800	AT1G23740
Leaves	AT4G10260	AT1G78570	AT3G16640
Leaves	AT5G28840	AT5G15490	AT3G50820
Leaves	AT2G29570	AT5G15490	AT3G61470
Leaves	AT2G35410	AT3G62830	AT5G42960
Leaves	AT5G20630	AT2G45310	AT1G65970
Leaves	AT5G15650	AT5G15650	AT1G15820
Leaves	AT4G20260	AT5G16510	AT1G07750
Leaves	AT5G46290	AT5G20950	AT5G62740
Leaves	ATCG00490	AT3G10740	AT5G38660
Leaves	ATCG00490	AT3G10740	AT3G47470
Leaves	AT2G39730	AT3G10740	AT1G68830
Leaves	AT4G26530	AT5G64570	AT5G06720
Leaves	AT5G14740	AT3G61490	AT3G14940
Leaves	AT1G12900	AT1G11580	AT5G44650
Leaves	ATCG00490	AT1G36160	AT3G60810
Leaves	AT2G39730	AT3G25860	AT5G11720
Leaves	AT4G33010	AT2G05990	AT4G01050
Leaves	AT2G44160	AT5G36880	AT3G04870
Leaves	AT3G17390	AT2G04350	AT5G05340
Leaves	AT4G01850	AT2G38540	AT2G04039
Leaves	AT3G60750	AT3G51590	AT5G20720
Leaves	AT3G60750	AT4G27270	AT1G07700
Leaves	AT3G17020	AT4G27270	AT5G09810
Leaves	AT3G19170	AT4G27270	AT1G61520
Leaves	AT2G39050	AT3G15730	AT5G50920
Leaves	AT4G20360	AT1G47480	AT1G36280
Leaves	ATMG00860	AT4G26690	AT1G06680
Leaves	AT2G04030	AT4G16760	AT2G21870
Leaves	AT5G28540	AT1G06550	AT3G54050
Leaves	AT5G63400	AT4G13360	AT1G14540
Leaves	AT3G58610	AT4G14440	AT5G09810
Leaves	AT1G79870	AT3G06860	AT3G06350
Leaves	AT3G05530	AT4G29010	AT5G01410
Leaves	AT1G63770	AT2G15620	AT1G12900
Leaves	AT4G02990	AT5G04140	AT1G17160
Leaves	AT2G29690	AT5G35630	AT1G03860
Leaves	AT2G44920	AT5G37600	AT1G77380
Leaves	AT2G21330	AT5G37600	AT3G15360
Leaves	AT3G26650	AT5G18170	AT2G24820
Leaves	AT5G35590	AT5G04740	AT3G10740
Leaves	AT4G14040	AT5G17330	AT2G28000
Leaves	AT2G27710	AT3G22200	AT5G35170
Leaves	AT3G12580	AT2G22250	AT1G77490
Leaves	AT2G33210	AT2G30970	AT5G27560
Leaves	AT2G02010	AT4G31990	AT5G54270
Leaves	AT1G02500	AT5G11520	AT3G01440
Leaves	AT3G59760	AT1G17290	AT5G03630
Leaves	AT2G18450	AT2G39800	AT2G20260
Leaves	AT3G60100	AT4G24830	AT3G14420
Leaves	AT3G59480	AT5G10920
Leaves	AT3G02230	AT4G29840
Leaves	AT2G26080	AT5G17920
Leaves	AT3G59970	AT5G17920
Leaves	AT1G02500	AT5G17920
Leaves	AT3G17390	AT1G02500
Leaves	AT2G45290	AT3G59890
Leaves	AT2G45290	AT5G21060
Leaves	AT1G49630	AT2G31810
Leaves	AT3G07770	AT3G58610
Leaves	AT5G42020	AT3G58610
Leaves	AT1G09100	AT1G74040
Roots	AT3G29360	AT1G80560
Roots	AT3G60750	AT4G34200
Roots	AT5G13420	AT4G34200
Roots	AT2G36460	AT5G65720
Roots	AT5G61410	AT2G43750
Roots	AT5G17920	AT3G61440
Roots	AT2G22250	AT4G14880
Roots	AT5G17330	AT2G35500
Roots	AT5G17920	AT1G80360
Roots	AT1G71695	AT1G69370
Roots	AT1G10360	AT1G69370
Roots	AT2G26040	AT5G10870
Roots	AT2G17420	AT2G04400
Roots	AT4G11650	AT4G02610
Roots	AT1G07890	AT5G38530
Roots	AT2G47730	AT5G63890
Roots	AT1G05260	AT5G62530
Roots	AT3G12110	AT4G13940
Roots	AT4G02580	AT2G33150
Roots	AT3G52300	AT2G33150
Roots	AT5G03300	AT2G14170
Roots	AT3G10300	AT1G79230
Roots	AT4G17870	AT1G12050
Roots	AT3G02520	AT1G19920
Roots	AT3G27430	AT4G14030
Roots	AT5G58070	AT2G40300
Roots	AT1G29250	AT5G63530
Roots	AT3G63270	AT4G14710
Roots	AT1G16350	AT1G74470
Roots	AT5G09810	AT5G60600
Roots	AT2G21170	AT5G48230
Roots	AT4G01070	AT5G48230
Roots	AT2G43180	AT3G54250
Roots	AT1G79550	AT3G63410
Roots	AT1G70730	AT1G57770
Roots	AT4G34200	AT3G04870
Roots	AT5G01320	AT3G53130
Roots	AT5G14780	AT5G23960
Roots	ATCG00490	AT1G77670
Roots	AT3G08590	AT2G33590
Roots	AT4G13940	AT4G35160
Roots	AT5G35630	AT4G35160
Roots	AT2G45300	AT4G35160
Roots	AT2G44160	AT4G35160
Roots	AT1G77670	AT2G37040
Roots	AT2G37040	AT2G37040
Roots	AT1G76140	AT2G37040
Roots	AT1G11840	AT3G19450
Roots	AT4G11600	AT4G39330
Roots	AT3G25230	AT3G21240
Roots	AT5G02500	AT2G40890
Roots	AT5G28540	AT5G54160
Roots	AT5G28540	AT1G74920
Roots	AT3G03960	AT3G48170
Roots	AT5G02500	AT4G24670
Roots	ATCG00480	AT1G59960
Roots	ATCG00480	AT5G13930
Roots	AT5G08680	AT4G01070
Roots	AT2G44100	AT4G12300
Roots	AT3G02090	AT1G17020
Roots	AT1G53750	AT1G75280
Roots	AT2G32520	AT1G75280
Roots	AT3G15730	AT5G67030
Roots	AT5G56680	AT1G52340
Roots	AT1G10840	AT1G28200
Roots	AT1G50200	AT2G40170
Roots	AT5G63400	AT5G50720
Roots	AT2G17900	AT2G02560
Roots	AT3G01850	AT1G60690
Roots	AT5G54160	AT1G60690
Roots	AT4G11600	AT1G60710
Roots	AT2G27170	AT3G19820
Roots	AT3G13860	AT1G55020
Roots	AT4G17050	AT1G55020
Roots	AT3G09440	AT3G22400
Roots	AT5G08690	AT3G45140
Roots	AT5G08690	AT3G45140
Roots	AT5G08690	AT5G42650
Roots	AT5G09550	AT3G25780
Roots	AT2G33210	AT2G06050
Seeds	AT1G48130	AT5G01410
Seeds	AT1G09310	AT5G54770
Seeds	AT1G09310	AT1G18870
Seeds	AT5G01300	AT4G18480
Seeds	AT1G45145	AT5G54190
Seeds	AT1G45145	AT5G63570
Seeds	AT1G45145	AT1G69740
Seeds	AT1G03230	AT5G08280
Seeds	AT1G75270	AT2G35840
Seeds	AT3G04120	AT1G43670
Seeds	AT2G32520	AT1G27680
Seeds	AT3G55040	AT1G27680
Seeds	AT2G32290	AT5G19220
Seeds	AT1G11840	AT5G48300
Seeds	AT1G07750	AT5G48300
Seeds	AT1G21750	AT1G11720
Seeds	AT1G21750	AT1G32900
Seeds	AT1G21750	AT1G32900
Seeds	AT1G53540	AT3G01180
Seeds	AT5G09590	AT3G01180
Seeds	AT5G09590	AT5G03650
Seeds	AT3G12580	AT5G03650
Seeds	AT3G12580	AT5G03650
Seeds	AT4G14030	AT1G06030
Seeds	AT1G53540	AT1G62660
Seeds	AT2G14170	AT4G29130
Seeds	AT5G01300	AT4G29130
Seeds	AT1G47710	AT1G73370
Seeds	AT4G15210	AT3G43190
Seeds	AT1G53540	AT3G43190
Seeds	AT1G48130	AT4G02280
Seeds	AT2G14170	AT4G26620
Seeds	AT1G05510	AT4G25000
		AT3G52180
		AT3G29320
		AT3G46970
		AT1G10760
		AT2G40840
		AT5G16150
		AT5G04360
		AT4G12400
		AT2G15220
		AT2G15220
		AT2G15220
		AT3G11660
		AT3G44220
		AT3G54420
		AT3G54420
		AT5G15870
		AT1G58170
		AT1G65870
		AT1G65870
		AT5G24090
		AT5G24090
		AT5G42510
		AT5G42510
		AT4G39640
		AT5G64940
		AT1G54050
		AT1G74310
		AT1G79930
		AT1G79930
		AT2G04030
		AT2G22360
		AT2G25140
		AT2G32120
		AT3G07770
		AT3G12580
		AT3G12580
		AT3G44110
		AT4G16660
		AT4G24190
		AT4G27670
		AT5G02500
		AT5G02500
		AT5G02500
		AT5G09590
		AT5G12020
		AT5G12020
		AT5G12030
		AT5G15450
		AT5G21430
		AT5G42020
		AT5G49910
		AT5G49910
		AT5G52640
		AT5G56000
		AT5G56000
		AT5G56010
		AT5G59720
		AT1G05260
		AT1G05260
		AT5G55530
		AT1G09560
		AT1G09560
		AT1G11360
		AT4G14630
		AT5G20630
		AT1G07700
		AT1G45145
		AT1G76080
		AT3G15360
		AT5G08410
		AT1G77510
		AT2G47470
		AT2G25080
		AT2G32720
		AT2G32720
		AT3G52880
		AT5G52240
		AT1G07890
		AT1G07890
		AT1G63940
		AT1G75270
		AT1G77490
		AT4G09010
		AT4G35000
		AT5G03630
		AT5G28840
		AT3G24170
		AT3G54660
		AT4G23100
		AT5G63030
		AT1G65970
		AT3G26060
		AT3G52960
		AT3G52960
		AT5G06290
		AT1G48130
		AT1G08830
		AT1G20630
		AT2G28190
		AT3G10920
		AT4G35090
		AT1G23820
		AT5G53120
		AT3G54470
		AT3G57610
		AT1G16350
		AT3G55010
		AT1G36280
		AT2G42910
		AT2G26230
		AT3G04080
		AT3G04080
		AT3G17810
		AT5G03300
		AT5G35170
		AT5G47840
		AT5G63400
		AT4G09320
		AT4G09320
		AT2G46860
		AT5G09650
		AT3G10850
		AT1G11840
		AT1G67280
		AT5G16450
		AT5G16450
		AT4G13930
		AT4G13930
		AT4G37930
		AT5G14780
		AT1G50480
		AT3G12290
		AT2G44160
		AT2G32520
		AT3G23600
		AT4G21580
		AT4G37560
		AT5G20960
		AT3G26280
		AT3G26320
		AT4G15440
		AT5G43940
		AT1G71695
		AT1G71695
		AT1G71695
		AT1G71695
		AT1G71695
		AT2G22420
		AT2G39040
		AT4G33420
		AT4G36430
		AT4G36430
		AT4G37530
		AT5G05340
		AT5G05340
		AT5G06720
		AT5G06720
		AT5G64120
		AT5G64120
		AT1G19715
		AT1G52120
		AT1G73040
		AT1G59610
		AT1G22380
		AT2G15480
		AT3G16520
		AT3G46670
		AT1G54870
		AT5G50700
		AT5G50700
		AT5G50700
		AT1G02850
		AT3G18080
		AT3G60130
		AT5G11720
		AT5G63840
		AT3G13750
		AT1G71500
		AT1G64760
		AT2G05790
		AT4G16260
		AT5G24318
		AT1G80410
		AT1G51990
		AT1G23740
		AT3G03080
		AT1G26420
		AT1G10370
		AT1G14540
		AT1G17180
		AT2G30860
		AT3G03190
		AT3G55040
		AT3G62760
		AT3G62760
		AT4G19880
		AT1G49760
		AT1G60900
		AT1G14220
		AT2G42520
		AT3G46780
		AT1G70790
		AT4G22140
		AT1G20696
		AT1G20220
		AT1G56110
		AT1G80270
		AT5G14260
		AT5G07350
		AT5G24120
		AT1G11650
		AT1G65260
		AT3G52150
		AT3G63140
		AT4G27000
		AT5G10770
		AT5G23750
		AT1G17640
		AT2G21660
		AT2G21660
		AT2G25970
		AT2G37220
		AT3G04500
		AT4G09040
		AT4G24770
		AT4G24770
		AT5G61030
		AT5G61030
		AT2G19480
		AT5G11170
		AT2G38810
		AT3G45980
		AT3G45980
		AT3G45980
		AT5G59870
		AT5G59870
		AT5G59870
		AT5G59870
		AT5G59910
		AT5G59910
		AT5G59970
		AT3G04880
		AT5G38470
		AT2G32415
		AT4G34490
		AT5G63190
		AT4G13780
		AT5G27470
		AT4G31180
		AT1G29880
		AT1G29880
		AT3G58140
		AT5G26830
		AT3G62120
		AT1G50200
		AT1G14610
		AT2G33800
		AT3G63490
		AT5G13510
		AT3G25920
		AT5G54600
		AT2G43030
		AT1G07320
		AT4G01310
		AT5G30510
		AT1G08360
		AT4G30800
		AT2G32060
		AT4G00100
		AT4G00100
		AT3G52580
		AT3G52580
		AT5G09500
		AT2G09990
		AT5G04800
		AT4G09800
		AT5G15520
		AT2G41840
		AT3G57490
		AT5G28060
		AT3G56340
		AT3G56340
		AT5G35530
		AT1G72370
		AT5G58420
		AT5G59850
		AT4G34670
		AT4G34670
		AT5G10360
		AT3G02560
		AT5G59240
		AT5G59240
		AT5G39850
		AT5G39850
		AT5G45775
		AT2G37190
		AT3G49010
		AT3G09630
		AT3G09630
		AT1G67430
		AT3G05590
		AT1G02780
		AT3G05560
		AT3G53020
		AT4G15000
		AT1G43170
		AT1G43170
		AT3G18740
		AT4G18100
		AT1G26880
		AT3G25520
		AT5G39740
		AT5G48760
		AT1G29970
		AT3G14600
		AT3G55280
		AT3G62870
		AT1G74050
		AT1G74050
		AT3G13580
		AT3G13580
		AT4G36130
		AT2G40010
		AT2G40010
		AT5G24510
		AT2G27710
		AT3G44590
		AT1G33140
		AT3G18610
		AT3G19760
		AT1G10840
		AT1G13950
		AT1G13950
		AT1G13950
		AT1G54270
		AT2G04520
		AT2G40290
		AT2G46290
		AT3G13920
		AT3G26400
		AT3G56150
		AT3G57290
		AT5G27640
		AT5G36230
		AT5G57870
		AT1G09640
		AT1G30230
		AT1G56070
		AT1G57720
		AT1G57720
		AT1G62750
		AT2G18110
		AT3G08740
		AT3G12390
		AT4G02930
		AT4G20360
		AT4G29060
		AT5G60390
		AT3G26618
		AT2G20890
		AT1G27310
		AT3G06720
		AT5G43960
		AT5G53480
		AT5G53480
		AT1G51980
		AT1G51980
		AT3G02090
		AT4G16160
		AT1G06950
		AT2G24820
		AT2G28900
		AT3G46740
		AT4G01800
		AT4G02510
		AT5G05000
		AT3G07100
		AT1G52600
		AT3G56190
		AT4G09160
		AT4G09160
		AT1G24510
		AT2G47170
		AT3G15260
		AT3G25800
		AT4G11260
		AT4G25130
		AT4G31750
		AT5G01920
		AT5G22470
		AT1G67700
		AT2G14260
		AT2G24200
		AT3G51800
		AT4G17830
		AT4G33090
		AT4G33090
		AT5G10540
		AT5G13520
		AT5G43600
		AT4G10540
		AT2G47110
		AT4G26840
		AT5G06460
		AT5G06460
		AT1G20200
		AT1G29150
		AT1G45000
		AT1G53750
		AT1G53850
		AT1G64520
		AT2G20580
		AT2G20580
		AT2G27020
		AT2G32730
		AT2G39990
		AT3G02200
		AT3G05530
		AT3G27430
		AT3G53970
		AT4G19006
		AT4G24820
		AT4G29040
		AT5G05780
		AT5G19990
		AT5G35590
		AT5G42790
		AT5G64760
		AT5G66140
		AT2G36060
		AT1G74410
		AT5G14420
		AT1G21780
		AT3G06190
		AT1G47128
		AT1G47128
		AT3G12490
		AT1G03220
		AT1G03220
		AT1G11910
		AT1G11910
		AT1G11910
		AT2G03200
		AT1G15000
		AT1G47710
		AT2G47940
		AT3G07950
		AT3G10410
		AT3G27925
		AT4G20850
		AT4G36195
		AT5G23140
		AT5G50920
		AT5G50920
		AT1G50250
		AT2G30950
		AT3G19170
		AT1G64110
		AT4G04910
		AT3G01480
		AT3G02530
		AT3G03960
		AT3G11830
		AT3G13470
		AT3G13860
		AT3G18190
		AT3G20050
		AT3G23990
		AT3G25230
		AT4G26780
		AT5G20720
		AT5G20720
		AT5G26360
		AT5G64350
		AT5G51970
		AT1G06690
		AT1G17160
		AT2G27680
		AT3G17940
		AT5G01670
		AT5G57655
		AT3G06580
		AT3G56310
		AT5G08370
		AT4G18810
		AT3G61140
		AT1G56130
		AT1G56130
		AT1G56340
		AT2G33380
		AT4G38810
		AT5G61790
		AT4G20260
		AT4G20260
		AT3G08510
		AT2G43980
		AT1G02130
		AT1G07410
		AT1G18070
		AT1G43890
		AT1G48630
		AT1G52280
		AT1G56050
		AT2G44610
		AT3G46060
		AT3G46060
		AT3G59920
		AT3G63130
		AT4G02080
		AT4G17170
		AT4G17530
		AT4G18800
		AT5G55190
		AT5G58590
		AT4G01370
		AT3G02520
		AT3G02520
		AT3G02520
		AT3G02520
		AT3G02520
		AT4G09000
		AT1G20010
		AT1G68090
		AT2G35490
		AT2G38750
		AT2G41740
		AT3G26070
		AT4G11000
		AT4G14960
		AT4G14960
		AT4G14960
		AT4G22240
		AT4G31340
		AT4G35450
		AT5G02130
		AT5G09810
		AT5G09810
		AT5G09810
		AT5G09810
		AT5G09810
		AT5G09810
		AT5G10230
		AT5G12250
		AT5G12250
		AT5G23860
		AT5G23860
		AT5G53400
		AT5G56600
		AT5G59890
		AT3G53230
		AT5G03340
		AT5G03340
		AT5G40770
		AT1G03860
		AT2G16600
		AT2G21130
		AT2G29960
		AT3G15520
		AT3G56070
		AT1G62020
		AT3G08530
		AT3G08530
		AT3G22845
		AT4G31490
		AT5G47180
		AT1G07750
		AT2G26560
		AT2G28490
		AT3G22640
		AT3G22640
		AT1G01470
		AT1G52690
		AT2G36640
		AT2G44060
		AT3G22490
		AT3G22500
		AT3G51810
		AT3G53040
		AT1G11430
		AT1G18100
		AT3G13290
		AT3G16640
		AT4G12420
		AT4G21150
		AT4G26740
		AT1G12840
		AT1G78900
		AT4G39080
		AT5G62670
		AT5G62670
		AT5G62670
		AT4G38510
		AT4G11150
		AT3G42050
		AT2G18960
		AT2G26900
		AT5G13490
		AT3G10350
		AT2G37170
		AT2G37170
		AT2G37170
		AT4G00430
		AT4G00430
		AT4G35100
		AT1G17810
		AT5G47450
		AT5G67500
		AT1G15690
		AT1G15690
		AT1G15690
		AT1G61800
		AT4G32400
		AT4G28390
		AT5G14040
		AT5G14040
		AT5G19760
		AT1G80300
		AT5G58070
		AT1G15330
		AT1G16880
		AT1G53280
		AT1G54320
		AT1G54780
		AT2G07732
		AT2G17120
		AT2G17120
		AT2G18540
		AT2G21160
		AT2G22170
		AT2G33550
		AT2G34460
		AT2G35450
		AT2G46740
		AT2G47970
		AT3G10260
		AT3G24420
		AT3G62160
		AT3G62160
		AT3G63460
		AT4G11220
		AT4G12830
		AT4G23895
		AT4G27585
		AT4G35250
		AT4G39730
		AT5G01300
		AT5G10860
		AT5G12040
		AT5G23890
		AT5G53490
		AT5G62740
		AT5G62740
		AT5G63620
		AT5G44310
		AT1G60420
		AT1G01320
		AT4G02450
		AT2G39050
		AT2G39050
		AT2G39050
		AT2G39050
		AT4G01050
		AT4G22670
		AT1G05510
		AT1G15980
		AT1G18730
		AT1G19140
		AT1G22600
		AT1G23170
		AT1G27150
		AT1G29700
		AT1G30580
		AT1G47420
		AT1G47980
		AT1G55480
		AT1G71310
		AT1G73060
		AT2G04039
		AT2G21820
		AT2G21870
		AT2G25950
		AT2G32240
		AT2G43180
		AT2G43180
		AT2G43180
		AT2G43950
		AT3G07030
		AT3G19340
		AT3G19990
		AT3G43520
		AT3G43540
		AT3G59780
		AT3G63540
		AT4G03200
		AT4G19100
		AT4G21210
		AT4G23890
		AT4G27500
		AT4G31530
		AT4G35870
		AT5G03880
		AT5G05480
		AT5G12470
		AT5G12470
		AT5G13030
		AT5G18400
		AT5G23060
		AT5G25460
		AT5G25757
		AT5G27560
		AT5G42960
		AT5G45690
		AT5G47490
		AT5G47860
		AT5G48540
		AT5G52420
		AT5G66780
		AT5G17310
		AT5G17310
		AT2G36460
		AT2G36460
		AT1G79550
		AT1G79550
		AT3G08590
		AT3G08590
		AT2G36530
		AT2G36530
		AT3G52990
		AT3G52990
		AT3G52990
		AT5G08570
		AT1G53310
		AT1G53310
		AT2G42600
		AT3G14940
		AT3G14940
		AT1G70730
		AT5G42740
		AT5G47810
		AT1G12000
		AT1G12000
		AT3G55440
		AT3G55440
		AT1G13440
		AT3G04120
		AT2G24270
		AT3G22960
		AT3G22960
		AT5G52920
		AT5G52920
		AT5G51820
		AT1G79530
		AT1G23800
		AT1G54100
		AT3G24503
		AT3G48000
		AT5G01320
		AT1G77120
		AT3G16910
		AT3G58750
		AT5G03860
		AT2G22780
		AT2G22780
		AT4G37870
		AT4G37870
		AT4G15530
		AT5G40760
		AT5G40760
		AT5G24400
		AT3G02360
		AT3G02360
		AT5G13420
		AT4G05390
		AT1G30120
		AT1G59900
		AT5G50850
		AT5G50850
		AT3G52200
		AT1G48030
		AT1G48030
		AT3G16950
		AT3G16950
		AT2G44350
		AT2G05710
		AT2G05710
		AT2G05710
		AT2G05710
		AT4G35830
		AT1G65930
		AT1G65930
		AT5G14590
		AT5G55070
		AT5G65750
		AT2G20420
		AT5G23250
		AT5G66760
		AT2G47510
		AT1G53240
		AT1G53240
		AT2G19900
		AT5G25880
		AT5G25880
		AT5G49460
		AT5G03290
		AT1G04410
		AT3G47520
		AT5G58330
		AT1G79440
		AT5G14740
		AT4G02580
		AT5G11770
		AT5G37510
		AT4G21490
		AT5G40810
		AT1G80230
		AT2G07698
		AT2G07698
		AT2G33040
		AT3G52300
		AT5G08680
		AT5G08680
		AT3G06350
		AT5G52100
		AT4G25290
		AT2G19480
		AT2G30620
		AT5G36790
		AT1G26220
		AT4G37560
		AT4G13010
		AT5G05340
		AT2G07732
		AT2G44920
		AT4G11220
		AT1G56500
		AT3G16610
		AT5G03795
		AT3G60810
		AT1G09340
		AT3G29185
		AT3G23760
		AT3G23760
		AT5G44650
		AT3G57560
		AT2G16570
		AT3G46100
		AT3G10670
		AT4G37200
		AT5G04710
		AT4G39710
		AT5G58140
		AT5G48760
		AT1G67090
		AT4G22890
		AT3G61470
		AT3G47470
		AT3G54890
		AT5G54270
		AT2G34420
		AT2G34420
		AT3G55330
		AT1G14150
		AT3G01440
		AT3G15360
		AT2G17390
		AT3G09580
		AT3G18890
		AT4G31390

## Sheet: PEP isoforms
Pearl Millet Accessions	AGI Codes	LC-1	LC-2	LC-3	LS-1	LS-2	LS-3	RS-1	RS-2	RS-3	RC-1	RC-2	RC-3	SS-1	SS-2	SS-3	SC-1	SC-2	SC-3
Pgl_GLEAN_10026714	AT1G53310	0.00038041	0.000648276	0.000734489	0.000250496	0.000405568	0.000303596	0	0.000489452	0.000748791	0.000274486	0	0.000810107	0.000561444	0.000238134	0.000423517	0.000818947	0.000379295	0.000441384
Pgl_GLEAN_10033055	AT1G53310	0	0.000260919	0	0	0.000136028	0	0	0.000656652	0	0.000828568	0.000983069	0.000815134	0.000225971	0.000119806	0.000284097	0.000117718	0.000381648	0
Pgl_GLEAN_10033512	AT2G42600	0.0140233	0.0148649	0.0214248	0.0113098	0.0108359	0.00924084	0	0	0	0	0	0	0	0	0	0	0	0
Pgl_GLEAN_10037989	AT3G14940	0.000128387	0.000262548	0.000185915	0.000126812	0.000136877	0.000153694	0	0.000991128	0.00126357	0.000833741	0.000494603	0.00109363	0.000454764	0.000241108	0.000428806	0.00071072	0.000384031	0.000297931
Pgl_GLEAN_10036281	AT3G14940	5.3527e-05	5.47308e-05	7.75117e-05	0.000105741	0.000114134	0.000128156	0	0	0	0	0	0	0	0	0	0	0	0
Pgl_GLEAN_10007218	AT2G42600	0	0	0	0	0	0	0	0	0	0	0	0	0.000431278	0.000457312	0.000361476	0.000299562	0.000242799	0.000188363
Pearl Millet Accessions	AGI Codes	LC-1	LC-2	LC-3	STDV	LC Average	LS-1	LS-2	LS-3	LS Average	RS-1	RS-2	RS-3	RS Average	RC-1	RC-2	RC-3	RC Average	SS-1	SS-2	SS-3	SS Average	SC-1	SC-2	SC-3	SC Average
Pgl_GLEAN_10026714	AT1G53310	0.00038041	0.000648276	0.000734489	0.000184642	0.000587725	0.000250496	0.000405568	0.000303596	0.000319887	0	0.000489452	0.000748791	0.000412748	0.000274486	0	0.000810107	0.000361531	0.000561444	0.000238134	0.000423517	0.000407699	0.000818947	0.000379295	0.000441384	0.000546542
Pgl_GLEAN_10033055	AT1G53310	0	0.000260919	0	0.000150642	8.69731e-05	0	0.000136028	0	4.53427e-05	0	0.000656652	0	0.000218884	0.000828568	0.000983069	0.000815134	0.00087559	0.000225971	0.000119806	0.000284097	0.000209958	0.000117718	0.000381648	0	0.000166456
Pgl_GLEAN_10033512	AT2G42600	0.0140233	0.0148649	0.0214248	0.00405223	0.016771	0.0113098	0.0108359	0.00924084	0.0104622	0	0	0	0	0	0	0	0	0	0	0	0	0	0	0	0
Pgl_GLEAN_10037989	AT3G14940	0.000128387	0.000262548	0.000185915	6.73071e-05	0.000192283	0.000126812	0.000136877	0.000153694	0.000139128	0	0.000991128	0.00126357	0.000751565	0.000833741	0.000494603	0.00109363	0.000807325	0.000454764	0.000241108	0.000428806	0.000374893	0.00071072	0.000384031	0.000297931	0.000464227
Pgl_GLEAN_10036281	AT3G14940	5.3527e-05	5.47308e-05	7.75117e-05	1.35135e-05	6.19232e-05	0.000105741	0.000114134	0.000128156	0.00011601	0	0	0	0	0	0	0	0	0	0	0	0	0	0	0	0
Pgl_GLEAN_10007218	AT2G42600	0	0	0	0	0	0	0	0	0	0	0	0	0	0	0	0	0	0.000431278	0.000457312	0.000361476	0.000416689	0.000299562	0.000242799	0.000188363	0.000243575
Pearl Millet Accessions	AGI Codes	Leaf Control	Leaf stress	Root control	Root stress	Seed control	Seed stress
Pgl_GLEAN_10026714	AT1G53310	0.000587725	0.000319887	0.000361531	0.000412748	0.000393992	0.000407699
Pgl_GLEAN_10033055	AT1G53310	8.69731e-05	4.53427e-05	0.00087559	0.000218884	0.000434811	0.000209958
Pgl_GLEAN_10033512	AT2G42600	0.016771	0.0104622	0	0	0	0
Pgl_GLEAN_10037989	AT3G14940	0.000192283	0.000139128	0.000807325	0.000751565	0.000644594	0.000374893
Pgl_GLEAN_10036281	AT3G14940	6.19232e-05	0.00011601	0	0	0	0
Pgl_GLEAN_10007218	AT2G42600	0	0	0	0	0.000138896	0.000416689
